# Supplementary material for: Risk of tuberculosis in patients with cancer treated with immune checkpoint inhibitors: a nationwide observational study
Source: PubMed Central journal article supplement — J Immunother Cancer. 2021 Sep 14;9(9):e002960. doi: 10.1136/jitc-2021-002960 (PMC8442094; doi:10.1136/jitc-2021-002960), 2021-09-14
Supplement: jitc-2021-002960supp001.pdf [file jitc-2021-002960supp001.pdf]

Supplementary Table 1. Diagnostic and drug codes used in this study

| Type                          | Name                                                                                                                               | Codes                                                                                                                                                                                     |                      |
|-------------------------------|------------------------------------------------------------------------------------------------------------------------------------|-------------------------------------------------------------------------------------------------------------------------------------------------------------------------------------------|----------------------|
| <b>Diagnoses</b>              |                                                                                                                                    |                                                                                                                                                                                           |                      |
| Cancer                        | Non-small cell lung cancer                                                                                                         | C34                                                                                                                                                                                       |                      |
|                               | Urothelial carcinoma                                                                                                               | C66-67                                                                                                                                                                                    |                      |
|                               | Melanoma                                                                                                                           | C43                                                                                                                                                                                       |                      |
| Outcome                       | Tuberculosis                                                                                                                       | A15, A16, A17, A18, A19                                                                                                                                                                   |                      |
| Comorbidities                 | Diabetes mellitus                                                                                                                  | E10, E11, E12, E13, E14                                                                                                                                                                   |                      |
|                               | Hypertension                                                                                                                       | I10, I11, I12, I13, I15                                                                                                                                                                   |                      |
|                               | Chronic lung disease                                                                                                               | J40, J41, J42, J43, J44, J45, J46, J47, J60, J61, J62, J63, J64, J65, J66, J67, I278, I279, J684, J701, J703                                                                              |                      |
|                               | Chronic kidney disease                                                                                                             | N03, N04, N18, N19, N25, N26, Z49, Z94, I120, I131, Z992                                                                                                                                  |                      |
|                               | Chronic liver disease                                                                                                              | K72, I850, I859, I864, I980, I983, K703, K704, K711, K715, K743, K744, K745, K746, K754, K762, K765, K766, K767                                                                           |                      |
|                               | Rheumatic disease                                                                                                                  | M05, M06, M07, M08, M09, M30, M31, M32, M33, M34, M35, M36, M45                                                                                                                           |                      |
|                               | HIV infection                                                                                                                      | B20, B21, B22, B23, B24                                                                                                                                                                   |                      |
|                               | Solid organ transplant                                                                                                             | Z940, Z941, Z942, Z943, Z944, Z948                                                                                                                                                        |                      |
|                               | Inflammatory bowel disease                                                                                                         | K50, K51                                                                                                                                                                                  |                      |
|                               | Hematologic malignancy                                                                                                             | C81, C82, C83, C84, C85, C86, C87, C88, C89, C90, C91, C92, C93, C94, C95, C96                                                                                                            |                      |
|                               | Latent tuberculosis                                                                                                                | R7680                                                                                                                                                                                     |                      |
|                               | <b>Drugs</b>                                                                                                                       |                                                                                                                                                                                           |                      |
|                               | Immune checkpoint inhibitor                                                                                                        | Nivolumab                                                                                                                                                                                 | 638401BIJ, 638402BIJ |
|                               |                                                                                                                                    | Pembrolizumab                                                                                                                                                                             | 639001BIJ            |
| Atezolizumab                  |                                                                                                                                    | 657701BIJ                                                                                                                                                                                 |                      |
| Conventional chemotherapy     | Carboplatin                                                                                                                        | 123701BIJ, 123702BIJ, 123703BIJ, 123704BIJ, 123705BIJ, 123706BIJ, 123707BIJ, 123708BIJ, 123730BIJ, 123731BIJ, 123732BIJ, 123733BIJ, 123734BIJ, 123735BIJ, 123736BIJ                       |                      |
|                               | Cisplatin                                                                                                                          | 134501BIJ, 134502BIJ, 134503BIJ, 134530BIJ, 134531BIJ, 134532BIJ, 134533BIJ, 134534BIJ                                                                                                    |                      |
|                               | Docetaxel                                                                                                                          | 148301BIJ, 148302BIJ, 148303BIJ, 148304BIJ, 148305BIJ, 148306BIJ, 148310BIJ, 148340BIJ, 148341BIJ, 148342BIJ, 148344BIJ, 148345BIJ, 148346BIJ, 148348BIJ, 148349BIJ, 148350BIJ, 148351BIJ |                      |
|                               | Gemcitabine                                                                                                                        | 164901BIJ, 164902BIJ, 164903BIJ, 164930BIJ, 164931BIJ, 164932BIJ                                                                                                                          |                      |
|                               | Irinotecan                                                                                                                         | 177401BIJ, 177402BIJ, 177403BIJ, 177404BIJ, 177405BIJ, 177406BIJ, 177407BIJ, 177408BIJ, 177430BIJ, 177431BIJ, 177432BIJ, 177433BIJ, 177434BIJ, 177435BIJ, 177436BIJ, 177437BIJ            |                      |
|                               | Paclitaxel                                                                                                                         | 503701BIJ                                                                                                                                                                                 |                      |
|                               | Alectinib                                                                                                                          | 656201ACH                                                                                                                                                                                 |                      |
|                               | Briqatinib                                                                                                                         | 675701ATB, 675702ATB, 675703ATB                                                                                                                                                           |                      |
|                               | Ceritinib                                                                                                                          | 634401ACH                                                                                                                                                                                 |                      |
|                               | Crizotinib                                                                                                                         | 617501ACH, 617502ACH                                                                                                                                                                      |                      |
|                               | Erlotinib                                                                                                                          | 477401ATB, 477402ATB, 477403ATB                                                                                                                                                           |                      |
|                               | Gefitinib                                                                                                                          | 453001ATB                                                                                                                                                                                 |                      |
|                               | Osimertinib                                                                                                                        | 652501ATB, 652502ATB                                                                                                                                                                      |                      |
|                               | Pemetrexed                                                                                                                         | 481201BIJ, 481202BIJ, 481203BIJ, 481204BIJ, 481205BIJ, 481230BIJ, 481231BIJ, 481232BIJ, 481233BIJ, 481234BIJ, 481235BIJ, 481237BIJ, 481239BIJ                                             |                      |
| Doxorubicin                   | 149401BIJ, 149402BIJ, 149403BIJ, 149404BIJ, 149405BIJ, 149406BIJ, 149430BIJ, 149431BIJ, 149432BIJ, 149433BIJ, 149434BIJ, 149435BIJ |                                                                                                                                                                                           |                      |
| Ifosfamide                    | 173301BIJ                                                                                                                          |                                                                                                                                                                                           |                      |
| Vinblastine                   | 247801BIJ, 247830BIJ                                                                                                               |                                                                                                                                                                                           |                      |
| Dabrafenib                    | 663101ACH, 663102ACH                                                                                                               |                                                                                                                                                                                           |                      |
| Vemurafenib                   | 620501ATB                                                                                                                          |                                                                                                                                                                                           |                      |
| Dacarbazine                   | 139901BIJ, 139902BIJ, 139903BIJ                                                                                                    |                                                                                                                                                                                           |                      |
| Interferon $\alpha$ -2b       | 175601BIJ, 175602BIJ, 175603BIJ, 175604BIJ, 175605BIJ, 175606BIJ, 175607BIJ, 175608BIJ, 175630BIJ, 175631BIJ                       |                                                                                                                                                                                           |                      |
| Anti-tuberculosis medications | Isoniazid                                                                                                                          | 178101ATB, 178102ATB, 178103ATB, 380200ACH, 380200ATB, 489200ATB, 519500ATB                                                                                                               |                      |
|                               | Rifampin                                                                                                                           | 223901ACH, 223902ACH, 223902ATB, 223903ACH, 223903ATB, 223904ACH, 223904ATB, 380200ACH, 380200ATB, 489200ATB, 519500ATB                                                                   |                      |
|                               | Ethambutol                                                                                                                         | 155601ATB, 155602ATB, 155603ATB, 155605ATB, 519500ATB                                                                                                                                     |                      |
|                               | Pyrazinamide                                                                                                                       | 221201ATB, 221202ATB, 489200ATB, 519500ATB                                                                                                                                                |                      |

|                    |                             |                                                                                                                                                                                                                                       |
|--------------------|-----------------------------|---------------------------------------------------------------------------------------------------------------------------------------------------------------------------------------------------------------------------------------|
|                    | Prothionamide               | 220401ATB, 220402ATB                                                                                                                                                                                                                  |
|                    | Cycloserine                 | 139101ACH                                                                                                                                                                                                                             |
|                    | Para-aminosalicylic acid    | 208101AGN, 208131AGN, 208130AGN                                                                                                                                                                                                       |
| Corticosteroids    | Prednisolone                | 217001ATB, 217003ASY, 217004ASY, 217030ASY, 217034ASY, 217035ASY, 217302BIJ                                                                                                                                                           |
|                    | Methylprednisolone          | 193302ATB, 193305ATB, 193501BIJ, 193502BIJ, 193530BIJ, 193531BIJ, 193601BIJ, 193602BIJ, 193603BIJ, 193604BIJ                                                                                                                          |
|                    | Hydrocortisone              | 170901ATB, 170905ATB, 170906ATB, 171201BIJ, 171202BIJ                                                                                                                                                                                 |
|                    | Dexamethasone               | 141901ATB, 141903ATB, 141904ATB, 142001BIJ, 142030BIJ, 142201BIJ, 142202BIJ, 142230BIJ, 142232BIJ, 142233BIJ                                                                                                                          |
| Immunosuppressants | Methotrexate                | 192101ATB, 192107ATB, 192102BIJ, 192103BIJ, 192104BIJ, 192105BIJ, 192107BIJ, 192108BIJ, 192109BIJ, 192110BIJ, 192111BIJ, 192132BIJ, 192134BIJ, 192136BIJ, 192138BIJ, 192139BIJ, 192140BIJ, 192141BIJ, 192142BIJ, 192143BIJ, 192144BIJ |
|                    | Leflunomide                 | 434601ATB, 434602ATB                                                                                                                                                                                                                  |
|                    | Ciclosporin (Cyclosporin A) | 139201ACS, 139201ACS, 139204ACS, 139202BIJ, 139230BIJ, 194701ACS, 194701ALQ, 194702ACS, 194730ALQ, 194731ALQ                                                                                                                          |
|                    | Cyclophosphamide            | 139001ATB, 139003BIJ, 139004BIJ, 139005BIJ                                                                                                                                                                                            |
|                    | Tacrolimus                  | 234201ACH, 234201ACH, 234201ATB, 234202BIJ, 234203ACH, 234203ATB, 234204ACH, 234204ATB, 234205ACR, 234206ACR, 234207ACR, 234208ATB, 234230BIJ                                                                                         |
|                    | Sirolimus                   | 485501ATB, 485502ATB, 485503ATB                                                                                                                                                                                                       |
|                    | Azathioprine                | 112401ATB, 112402ATB                                                                                                                                                                                                                  |
|                    | Sulfasalazine               | 232801ATE                                                                                                                                                                                                                             |
|                    | Mycophenolate mofetil       | 197801ACH, 197802ATB, 197804ASS, 197830ASS, 451401ATE, 451402ATE                                                                                                                                                                      |
|                    | Everolimus                  | 485601ATB, 485602ATB, 485603ATB, 485604ATB, 485605ATB, 485606ATB, 485607ATB                                                                                                                                                           |
|                    | Bucillamine                 | 348201ATB                                                                                                                                                                                                                             |
|                    | Mizoribine                  | 196601ATB, 196602ATB                                                                                                                                                                                                                  |
|                    | Temsirolimus                | 568201BIJ, 568230BIJ                                                                                                                                                                                                                  |
